# Supplementary material
Source: Springer Nature journal article supplement (https://www.springermedizin.de/resource/supplementary/12967_2011_733_MOESM6_ESM.pdf/9577390)

vehicle

NBD

A. H&E

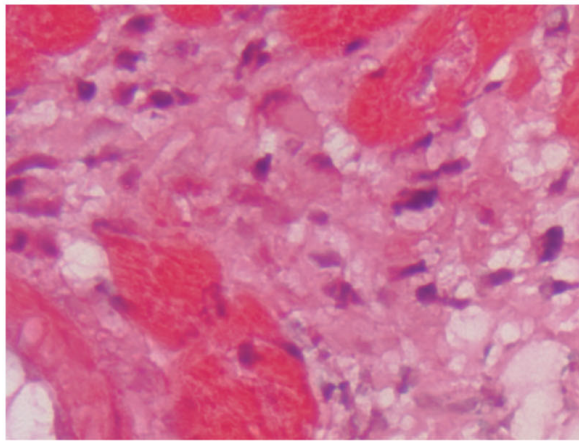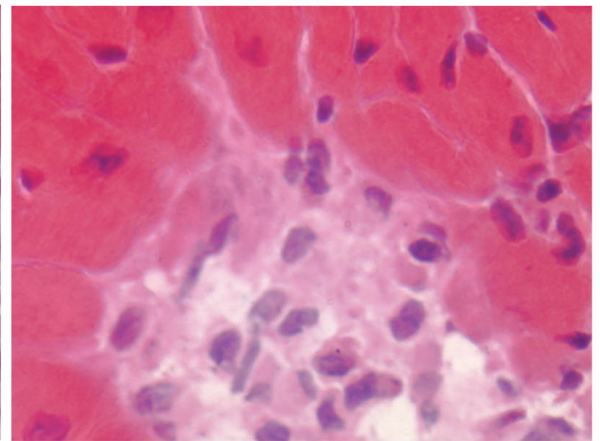

B. collagen I

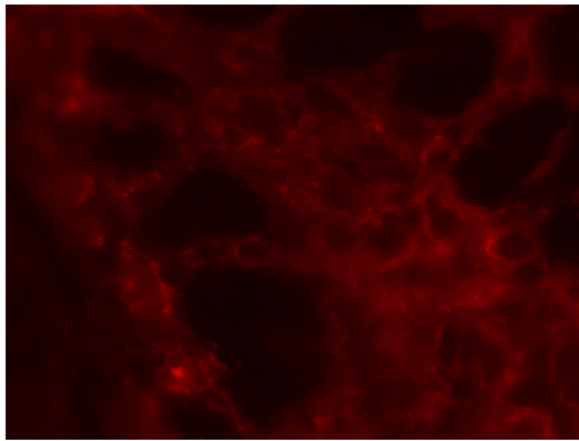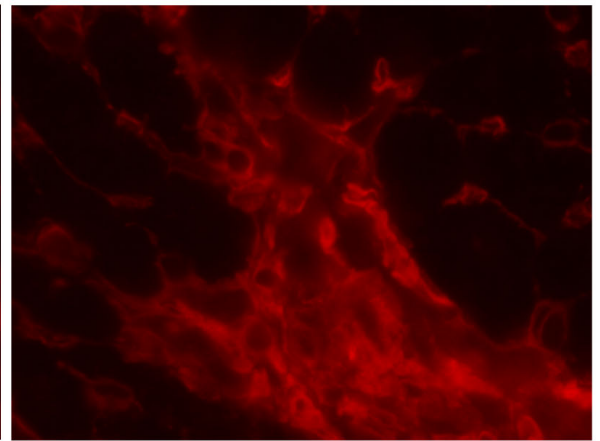

C. ER-TR7

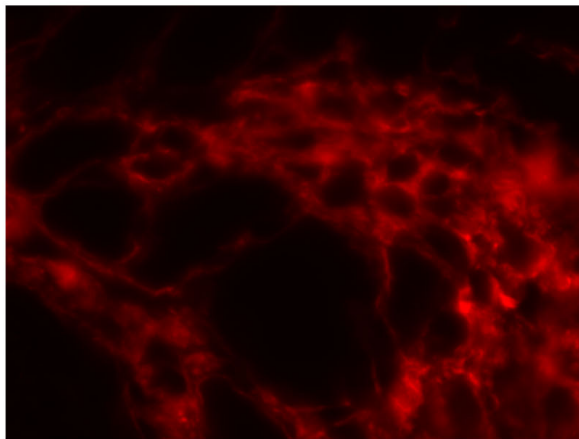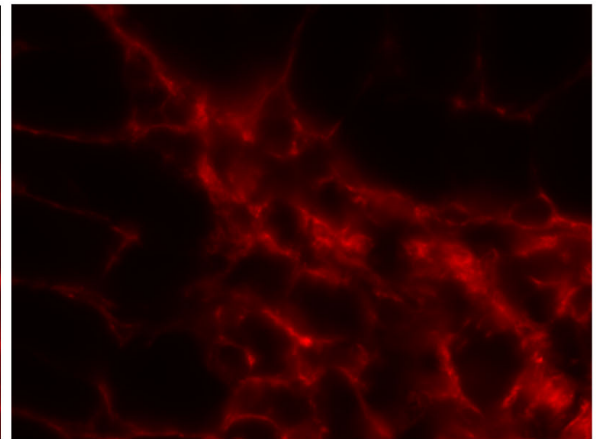

D. CD-45

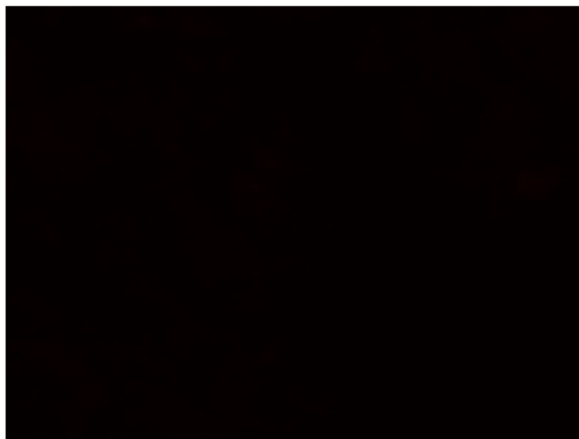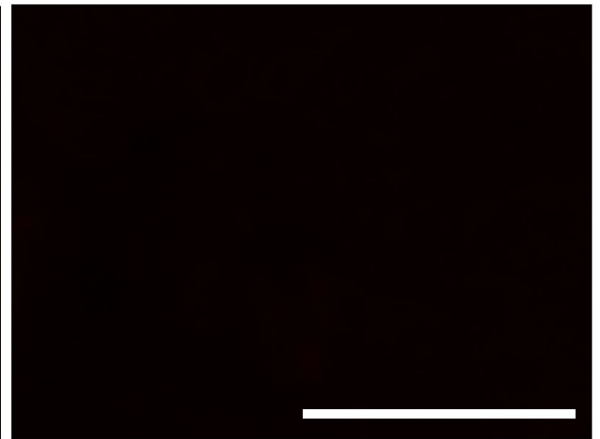

Supplement: MOESM6 [file 9577390]
